# Supplementary material
Source: MDPI journal article supplement (https://www.mdpi.com/1424-2818/14/7/519)
Supplement: s1 [file s1]

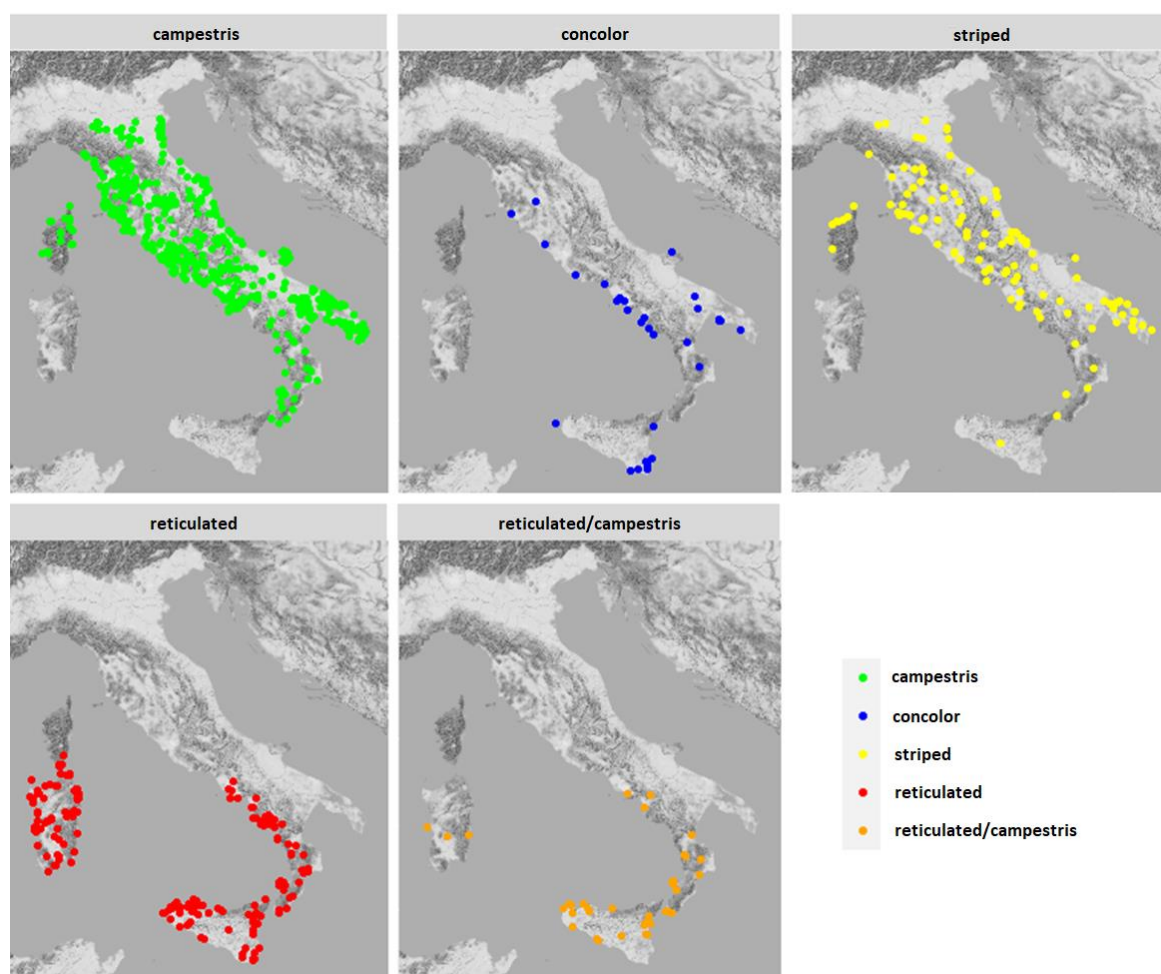

**Figure S1.** Geographic distribution of each phenotype.

| CODE  | VARIABLE                                             |
|-------|------------------------------------------------------|
| BIO2  | Mean Diurnal Range                                   |
| BIO3  | Isothermality ((BIO2/BIO7) x 100)                    |
| BIO4  | Temperature Seasonality (std dev x 100)              |
| BIO6  | Min Temperature of Coldest Month                     |
| BIO7  | Temperature Annual Range (BIO5-BIO6)                 |
| BIO9  | Mean Temperature of Driest Quarter                   |
| BIO12 | Annual Precipitation                                 |
| BIO15 | Precipitation Seasonality (Coefficient of Variation) |
| BIO18 | Precipitation of Warmest Quarter                     |

**Table S2.** BioClim variables and related codes.

|              | PC1    | PC2    | PC3    | PC4    |
|--------------|--------|--------|--------|--------|
| <b>bio2</b>  | 0.160  | 0.667  | 0.032  | 0.030  |
| <b>bio3</b>  | -0.169 | 0.635  | -0.205 | 0.165  |
| <b>bio4</b>  | 0.397  | 0.042  | 0.351  | -0.078 |
| <b>bio6</b>  | -0.393 | 0.132  | -0.020 | 0.107  |
| <b>bio7</b>  | 0.365  | 0.328  | 0.254  | -0.077 |
| <b>bio9</b>  | -0.339 | 0.148  | -0.090 | -0.841 |
| <b>bio12</b> | 0.296  | -0.026 | -0.785 | -0.156 |
| <b>bio15</b> | -0.376 | 0.033  | -0.157 | 0.446  |
| <b>bio18</b> | 0.396  | -0.034 | -0.346 | 0.134  |

**Table S3.** PCA loadings.

|                        | PC1       | PC2       | PC3        | PC4        |
|------------------------|-----------|-----------|------------|------------|
| Eigenvalue             | 5.3589357 | 1.9262957 | 0.79247003 | 0.45295611 |
| Standard deviation     | 2.3149375 | 1.3879106 | 0.89020786 | 0.67302014 |
| Proportion of Variance | 59.54%    | 21.40%    | 8.81%      | 5.03%      |
| Cumulative Proportion  | 59.54%    | 80.94%    | 89.75%     | 94.78%     |

**Table S4.** Importance of components of PCA.
